# Supplementary material for: Future tropospheric ozone budget and distribution over East Asia under a Net Zero scenario
Source: Copernicus journal article supplement (doi:10.5194/egusphere-2023-1592), 2023-07-21
Supplement: Supplementary file 1 [file egusphere-2023-1592-supplement.pdf]

Supplement of

## Future tropospheric ozone budget and distribution over East Asia under a Net Zero scenario

Xuwei Hou et al.

Correspondence to: Xuwei Hou (houxw@nuist.edu.cn)

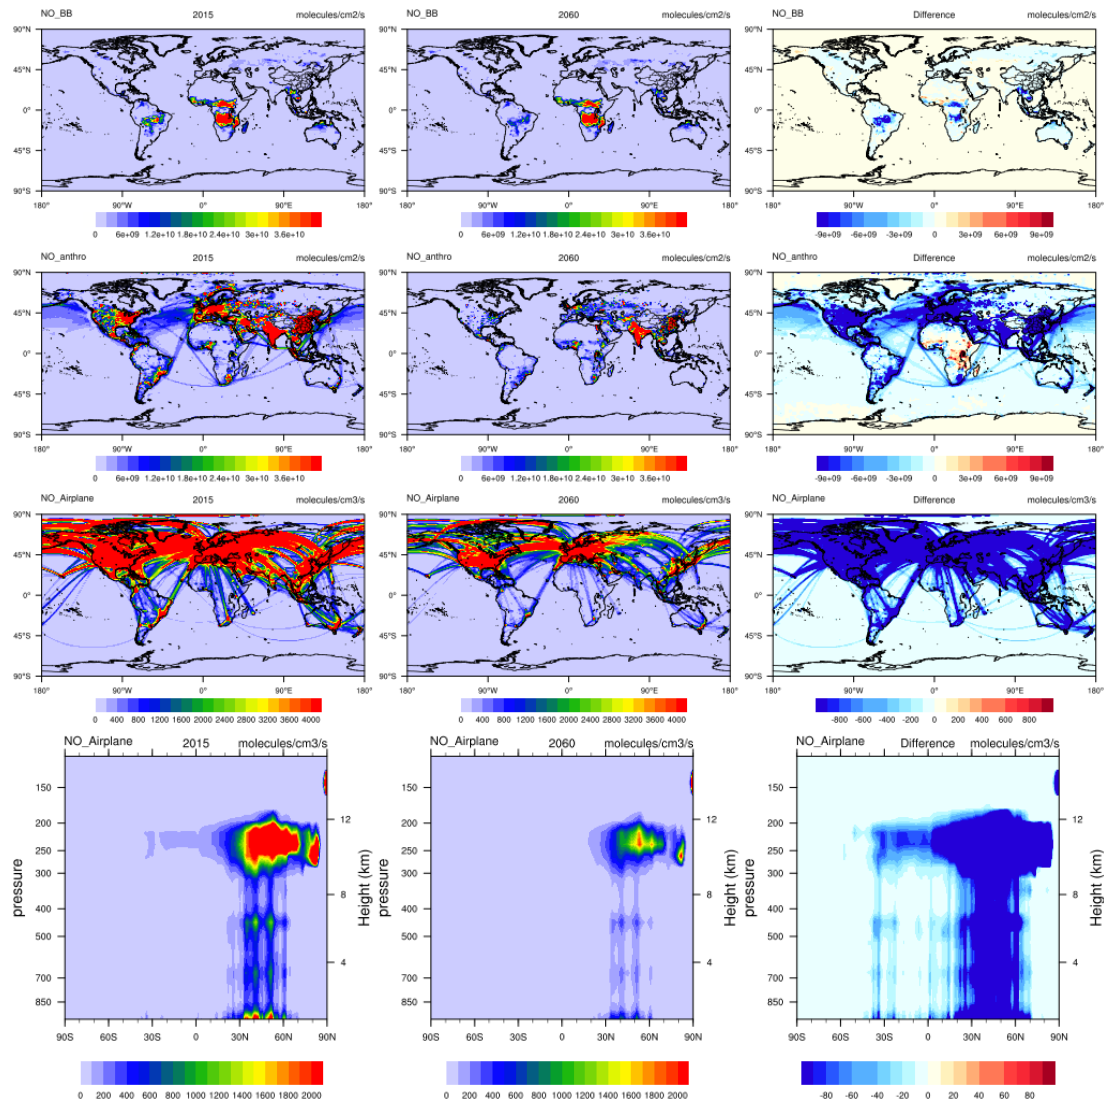

Figure S1 The biomass burning (BB), anthropogenic (anthro), and horizontal and vertical airplane emissions of NO<sub>x</sub> in 2015 (PD, left), 2060 (Net Zero, middle) and their differences (right).

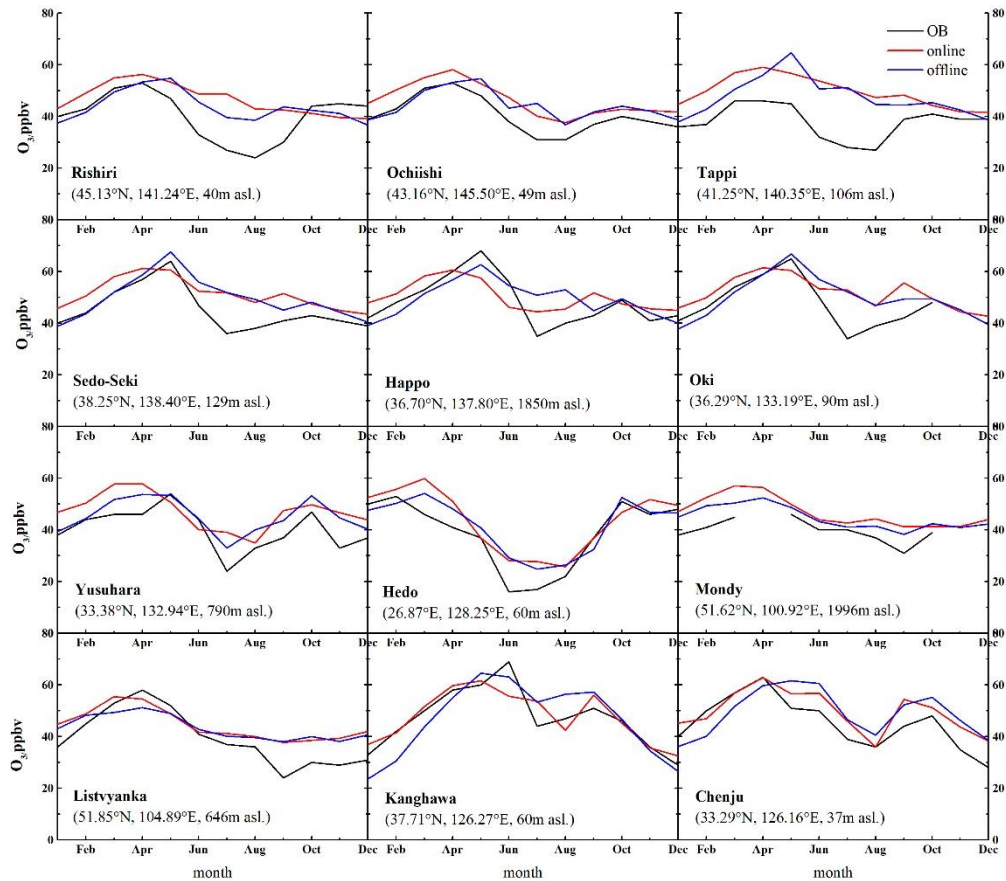

Figure S2 The comparisons of surface  $O_3$  (ppbv) among EANET observations (black), online-PD (red), and offline-PD (blue) simulated results in 2015. The online simulated data is monthly mean from 2015 to 2016.

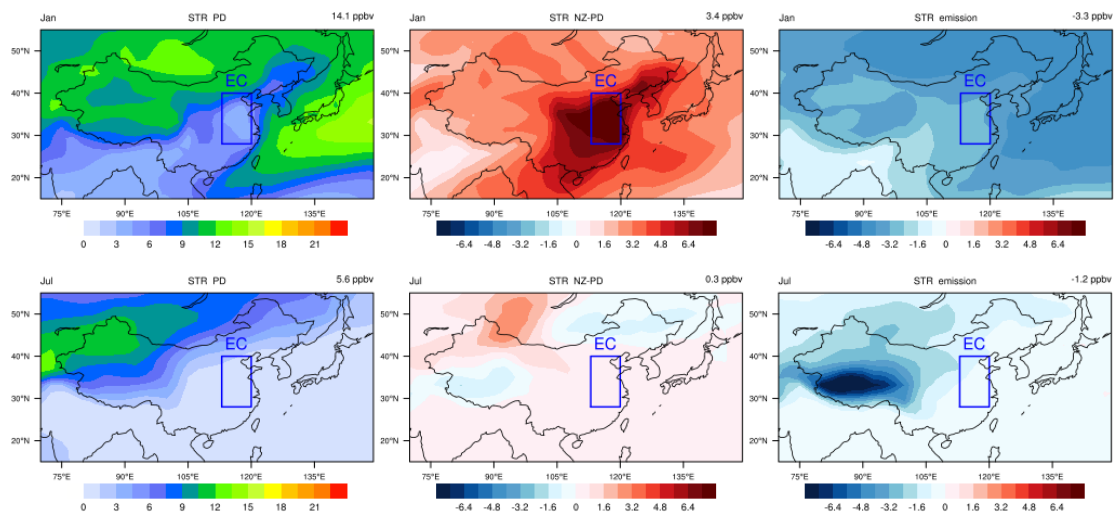

Figure S3 The contributions of stratospheric  $O_3$  (STR) on surface (ppbv) over East Asia for January and July in present day (PD, online simulation, left), the changes between PD and NZ (NZ minus PD, online simulation, middle), and the changes due to emissions (NZ minus PD, offline simulation,

right). The values in the right corner of each sub-figure are the regional average over East Asia ( $15^{\circ}\sim 55^{\circ}\text{N}$ ,  $70^{\circ}\sim 149^{\circ}\text{E}$ ). The frame is the region of Eastern China (EC,  $28^{\circ}\sim 40^{\circ}\text{N}$ ,  $113^{\circ}\sim 120^{\circ}\text{E}$ ).
